# Supplementary material for: Rhenium(I) Block Copolymers Based on Polyvinylpyrrolidone: A Successful Strategy to Water-Solubility and Biocompatibility
Source: MDPI journal article supplement (doi:10.3390/molecules28010348), 2023-01-01
Supplement: s1 [file s1]

# Electronic Supporting Information for the article

## **Rhenium(I) Block-Copolymers Based on Polyvinylpyrrolidone: Successful Strategy to Water-Solubility and Biocompatibility**

**Kristina S. Kisel <sup>1</sup>, Vadim A. Baigildin <sup>1</sup>, Anastasia I. Solomatina <sup>1</sup>, Alexey I. Gostev <sup>2</sup>, Eugene V. Sivtsov <sup>2</sup>, Julia R. Shakirova <sup>1,\*</sup> and Sergey P. Tunik <sup>1,\*</sup>**

<sup>1</sup> Institute of Chemistry, Saint-Petersburg State University, Universitetskii pr., 26, 198504 St. Petersburg, Russia

<sup>2</sup> Department of physical chemistry, Saint-Petersburg State Institute of Technology (Technical University), Moskovskiy pr. 26, 190013 St. Petersburg, Russia

\* Correspondence: y.r.shakirova@spbu.ru (J.R.S.), sergey.tunik@spbu.ru (S.P.T.)

### Content

|                                                                                                                          |    |
|--------------------------------------------------------------------------------------------------------------------------|----|
| Part 1. NMR spectroscopy, ESI mass-spectrometry, XRD-analysis of complexes Re1–Re4.....                                  | 2  |
| Part 2. NMR spectroscopy and Dynamic light scattering analysis of p(VP-l), p(VP-h) and p(VP-l/h-Re1)–p(VP-l/h-Re4) ..... | 6  |
| Part 3. Electronic absorption spectra of complexes Re1–Re4.....                                                          | 10 |
| Part 4. Photophysical properties of p(VP-l/h-Re1)–p(VP-l/h-Re4).....                                                     | 11 |
| Part 5. Cell experiments for Re2 .....                                                                                   | 13 |

## Part 1

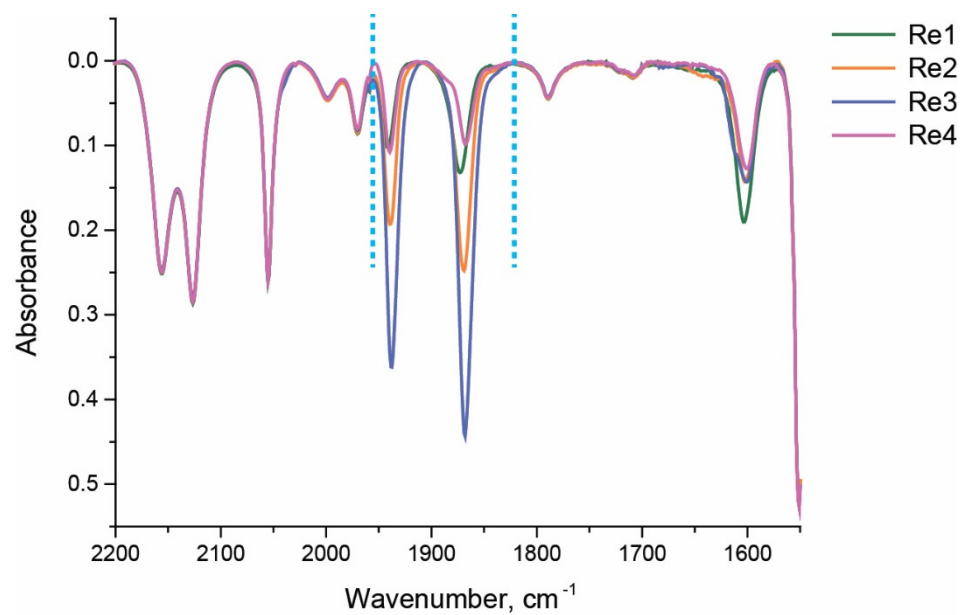

Figure S1. IR spectra of Re1–Re4 ( $\text{CD}_2\text{Cl}_2$ ).

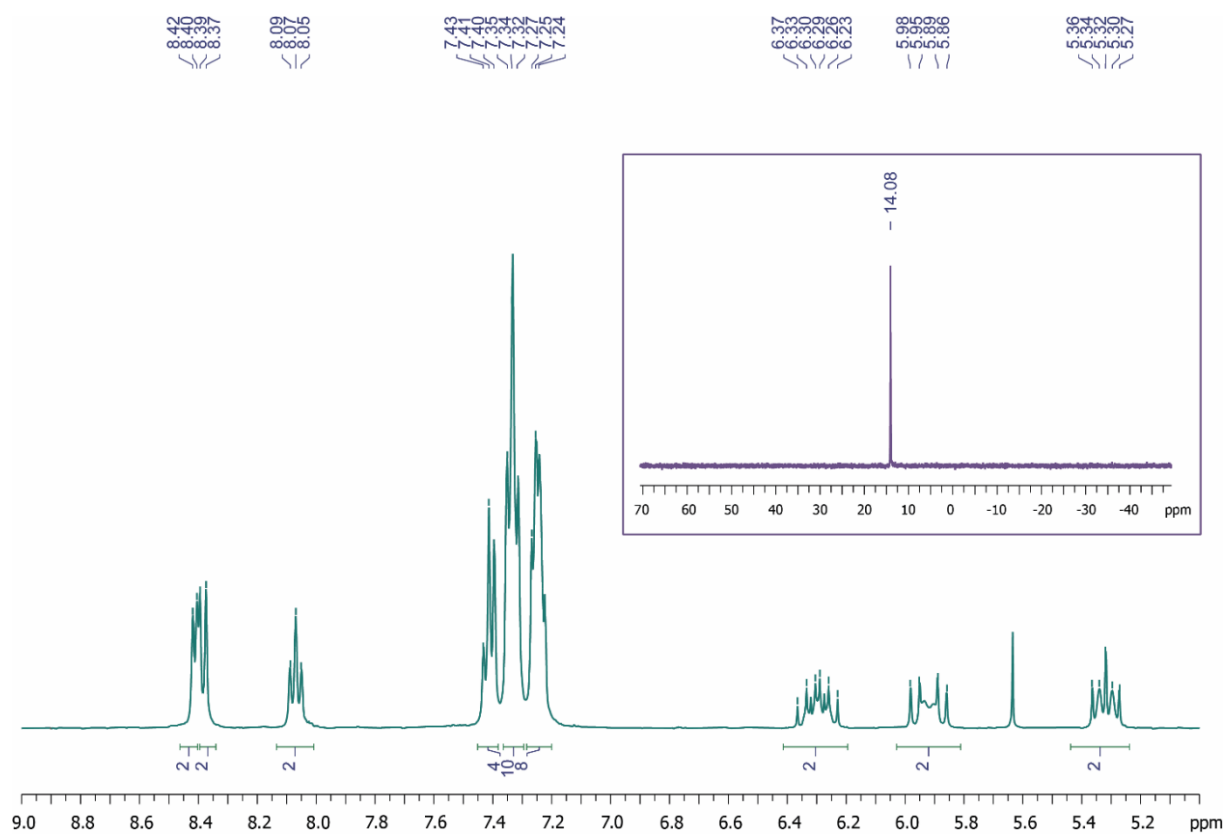

Figure S2.  $^1\text{H}$  NMR and  $^{31}\text{P}\{^1\text{H}\}$  spectra of **Re1** (acetone- $d_6$ , 298K).

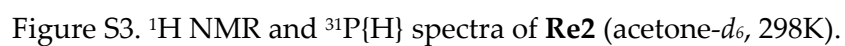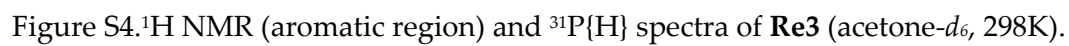

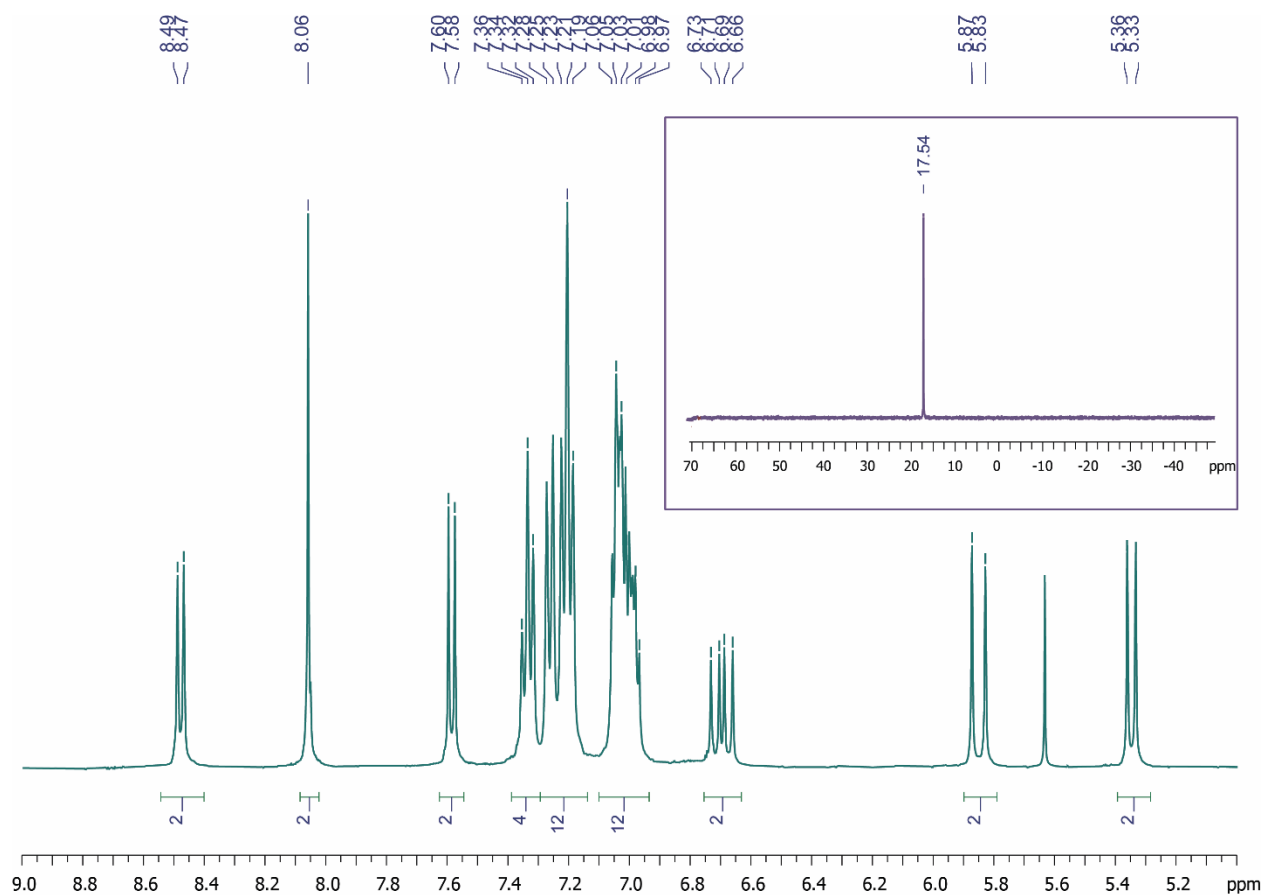

Figure S5.  $^1\text{H}$  NMR (aromatic region) and  $^{31}\text{P}\{^1\text{H}\}$  spectra of **Re4** (acetone- $d_6$ , 298K).

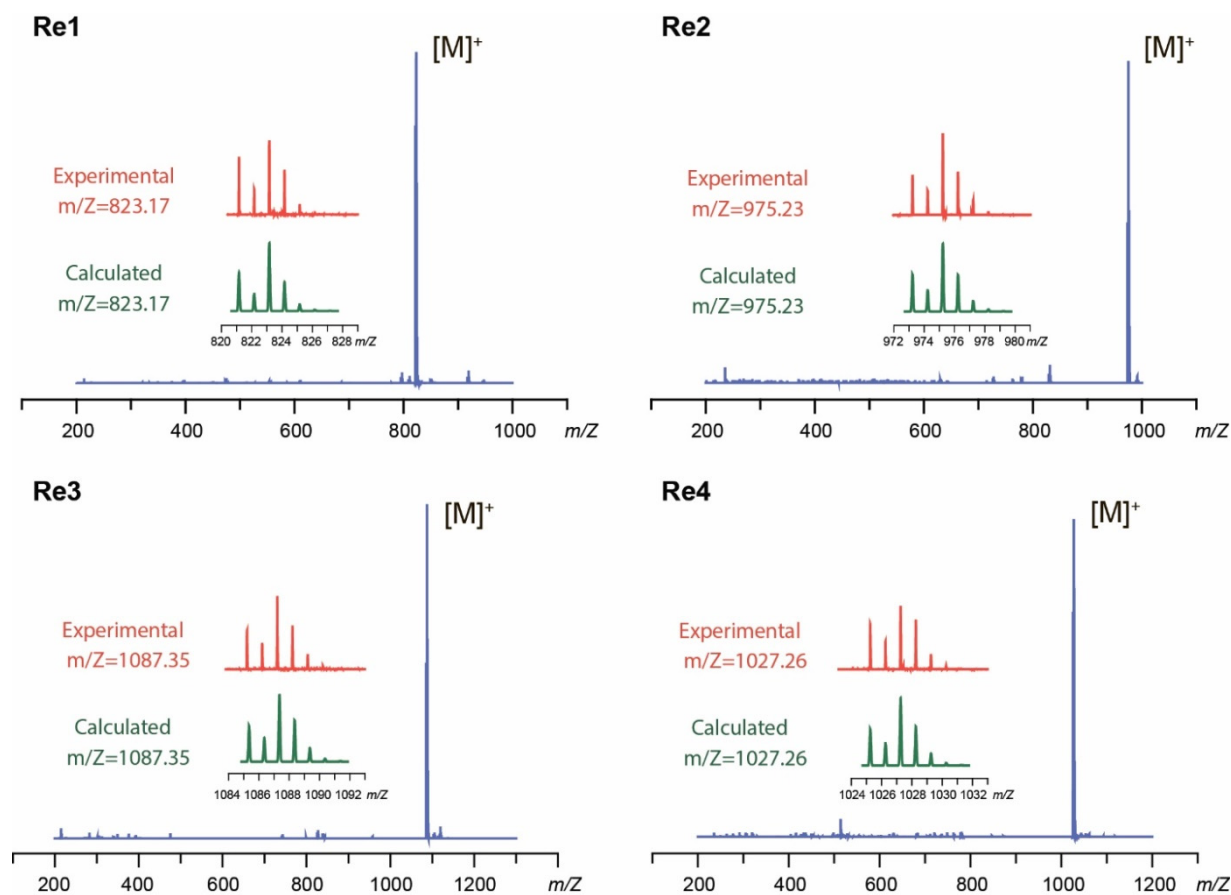

Figure S6. ESI $^+$  mass spectra of **Re1–Re4**.

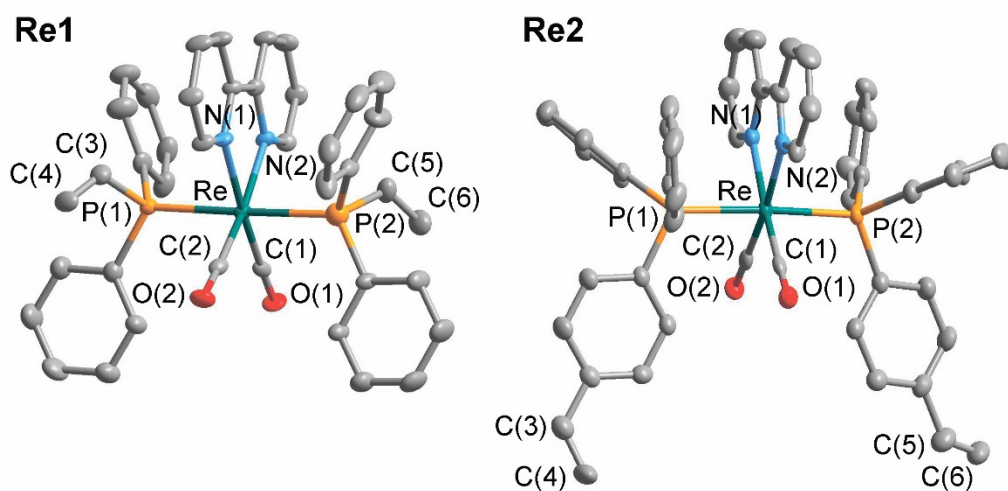

Table S1. Selected bond lengths and angles for **Re1** and **Re2**.

|                 | <b>Re1</b> | <b>Re2</b> |
|-----------------|------------|------------|
| Bond lengths, Å |            |            |
| Re-N1           | 2.172(5)   | 2.175(4)   |
| Re-N2           | 2.177(4)   | 2.171(5)   |
| Re-P1           | 2.4079(15) | 2.4347(12) |
| Re-P2           | 2.4047(15) | 2.4218(12) |
| Re-C1           | 1.905(6)   | 1.910(6)   |
| Re-C2           | 1.921(6)   | 1.904(6)   |
| C3-C4           | 1.295(11)  | 1.298(10)  |
| C5-C6           | 1.304(12)  | 1.292(11)  |
| Bond angles, °  |            |            |
| N1-Re-N2        | 74.58(18)  | 74.96(17)  |
| C(1)-Re-C(2)    | 91.5(2)    | 93.0(2)    |
| P(1)-Re1-P(2)   | 178.35(5)  | 176.53(4)  |

## Part 2

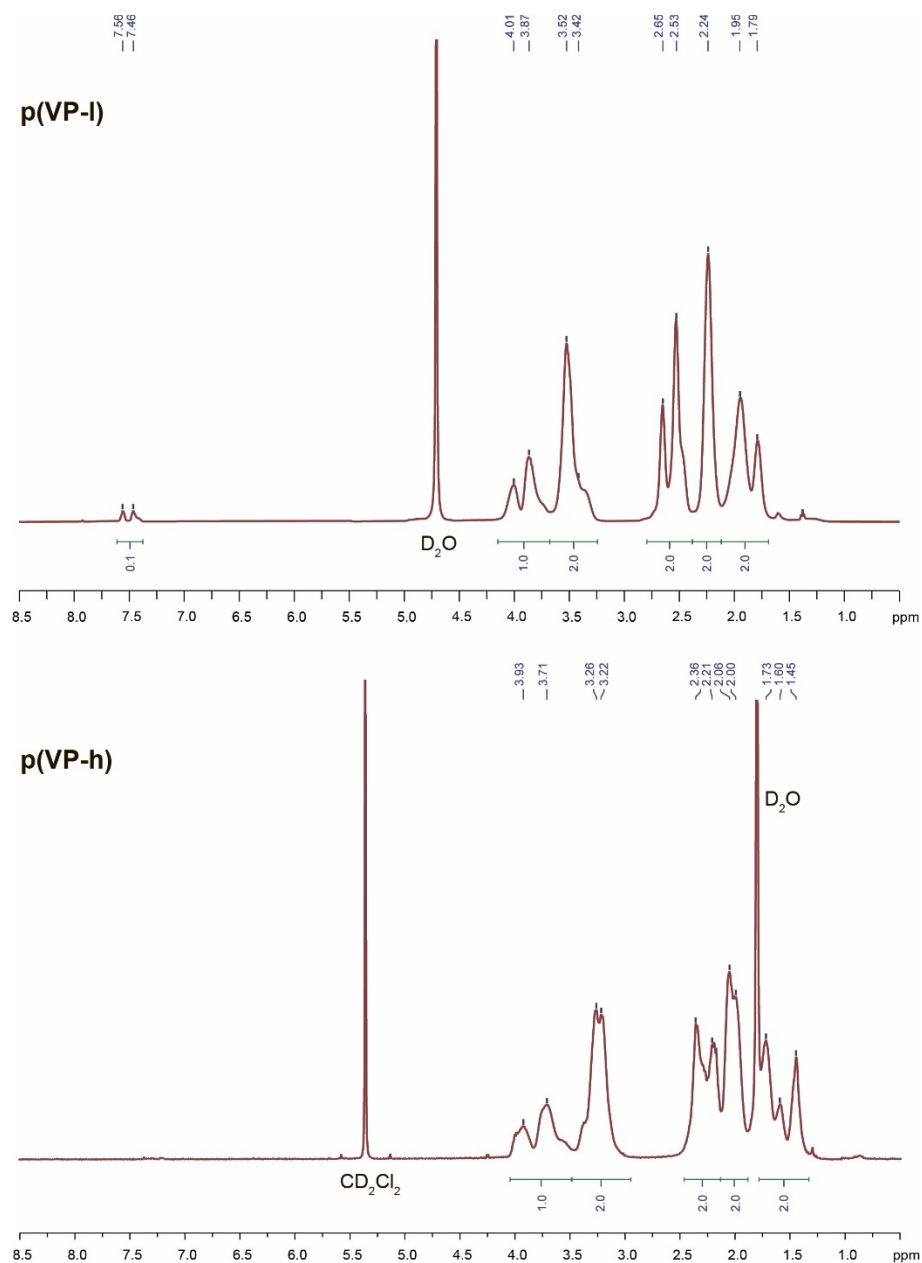

Figure S7.  $^1\text{H}$  NMR spectra of **p(VP-l)** ( $\text{D}_2\text{O}$ , 298K) and **p(VP-h)** ( $\text{CD}_2\text{Cl}_2$ , 298K).

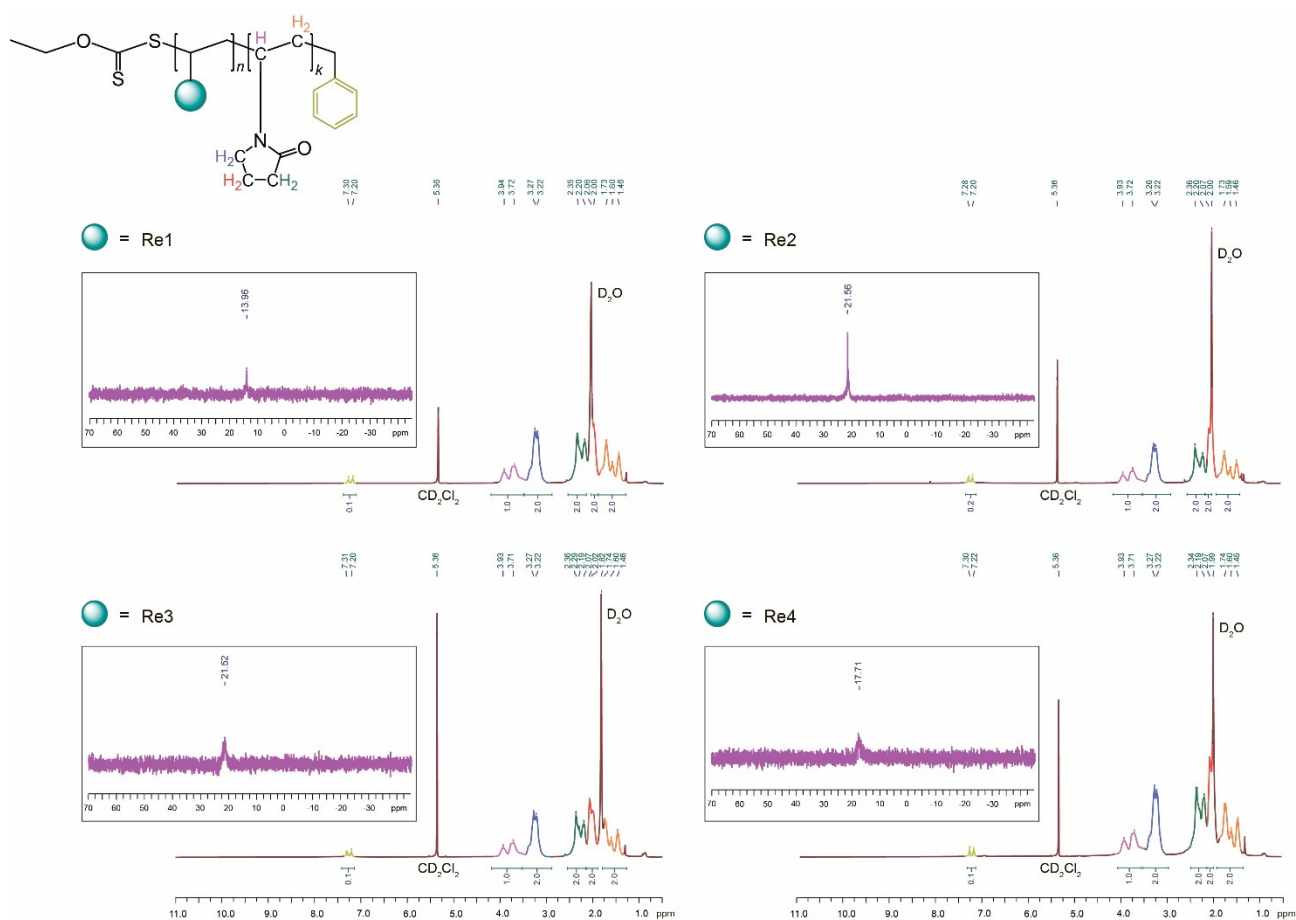

Figure S8.  $^1\text{H}$  NMR and  $^{31}\text{P}\{\text{H}\}$  spectra of **p(VP-l-Re)** ( $\text{CD}_2\text{Cl}_2$ , 298K).

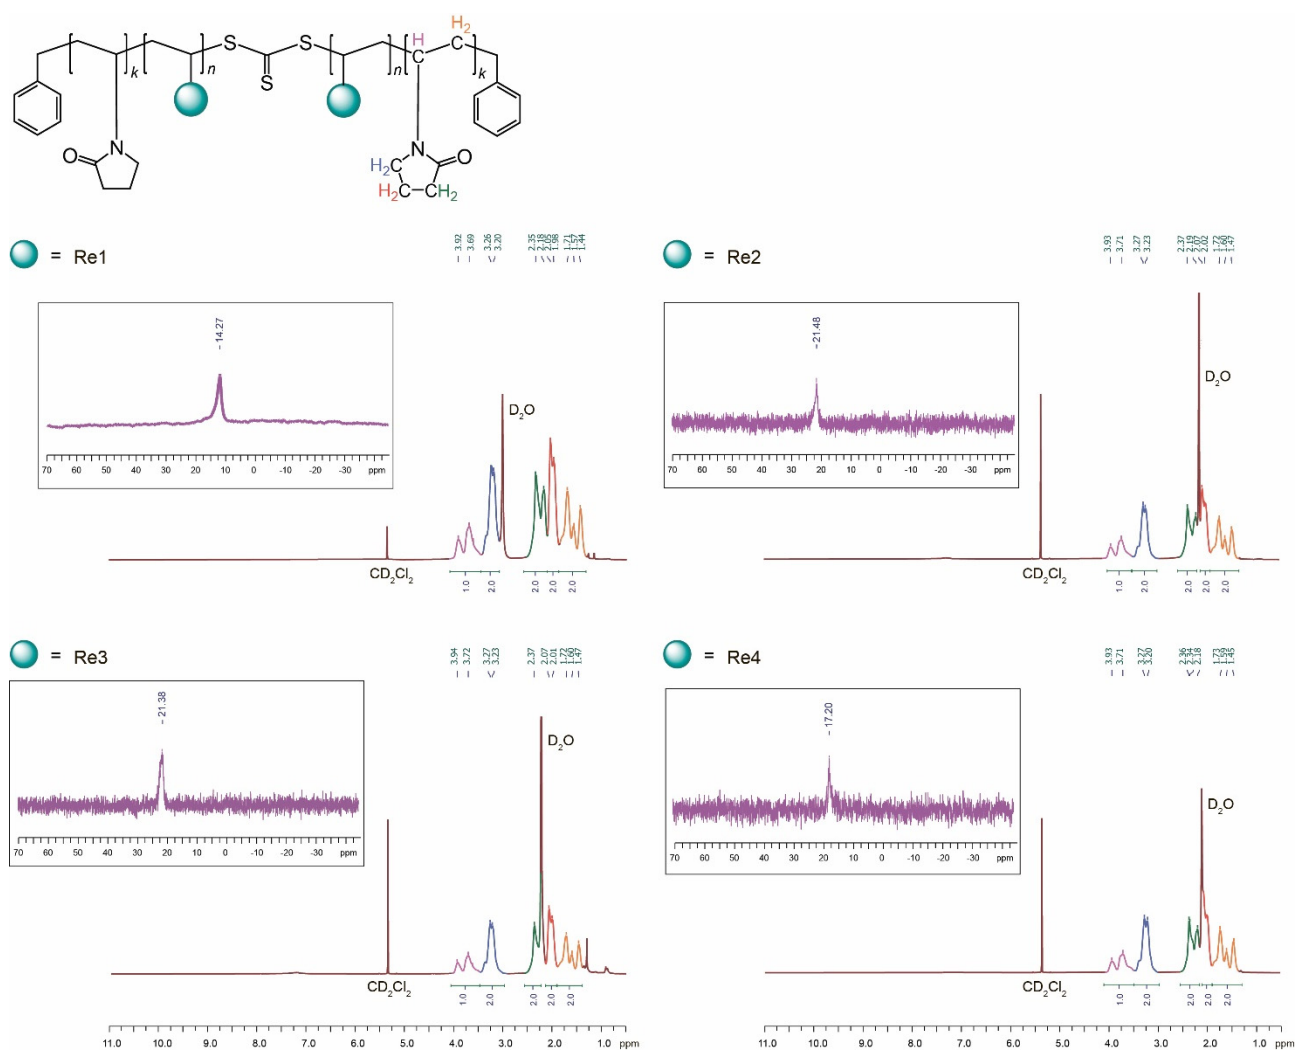

Figure S9.  $^1\text{H}$  NMR and  $^{31}\text{P}\{\text{H}\}$  spectra of **p(VP-h-Re)** ( $\text{CD}_2\text{Cl}_2$ , 298K)



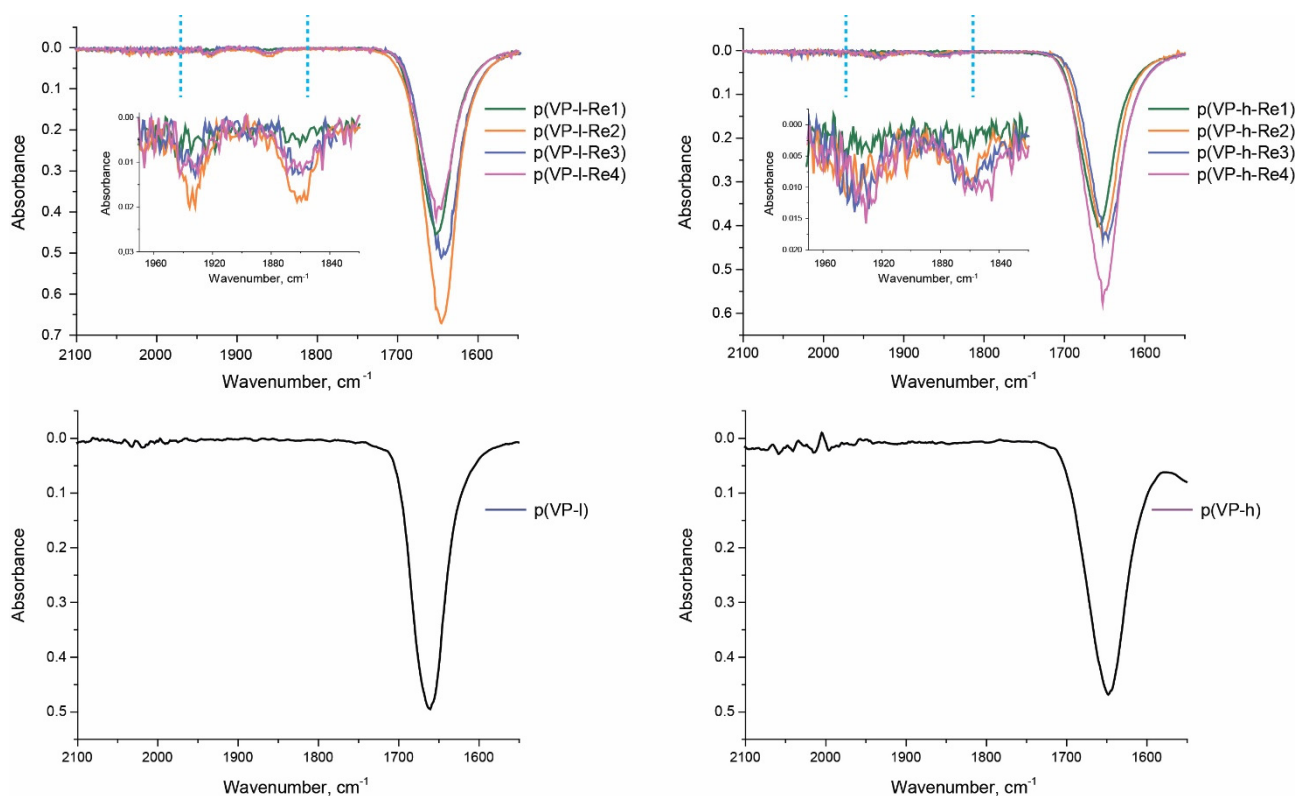

Figure S10. Top: IR spectra of the block-copolymers p(VP-l/h-#) (solid samples). Bottom: IR spectra of the polymers p(VP-l/h) for comparison (solid samples).

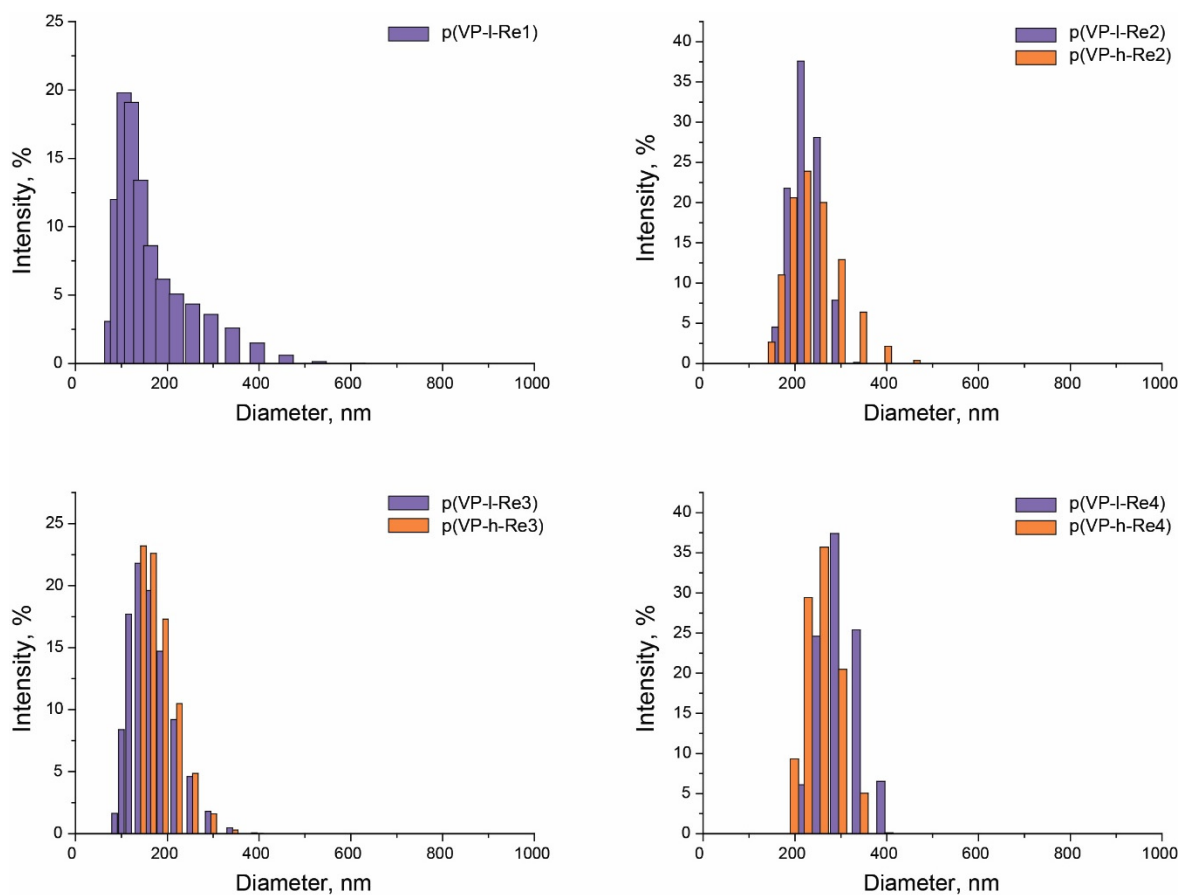

Figure S11. Particle sizes of the the **p(VP-l/h-Re)** polymers determined by dynamic light scattering in H<sub>2</sub>O.

### Part 3

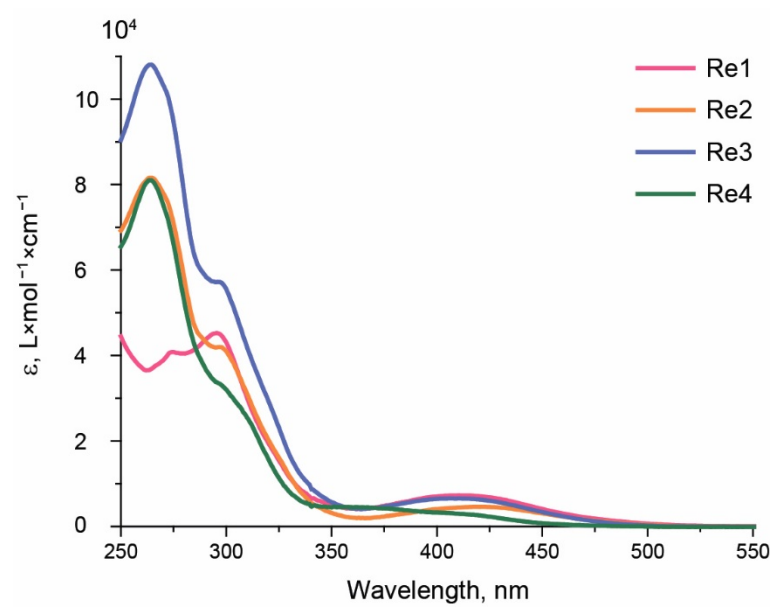

Figure S12. Electronic absorption spectra of complexes **Re1–Re4** in MeOH, 20°C.

## Part 4

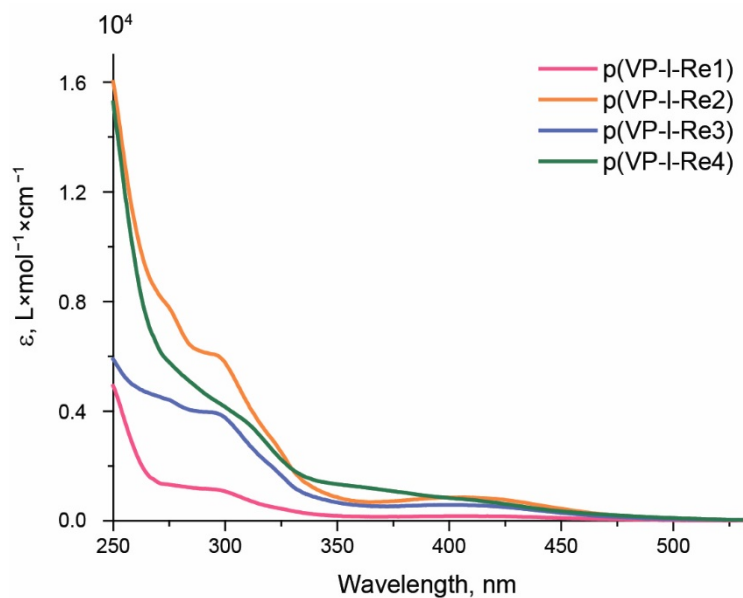

Figure S13. Electronic absorption spectra of **p(VP-l-Re)** in MeOH at 37°C.

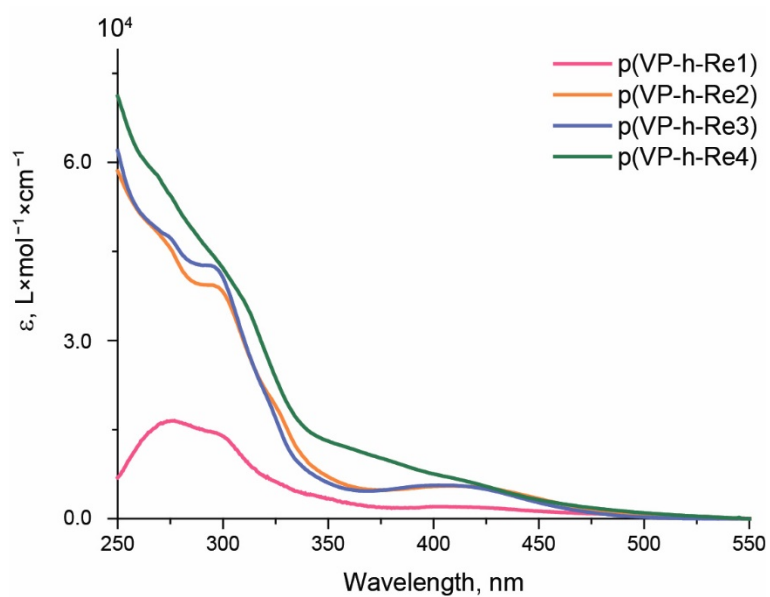

Figure S14. Electronic absorption spectra of **p(VP-h-Re)** in MeOH at 37°C.

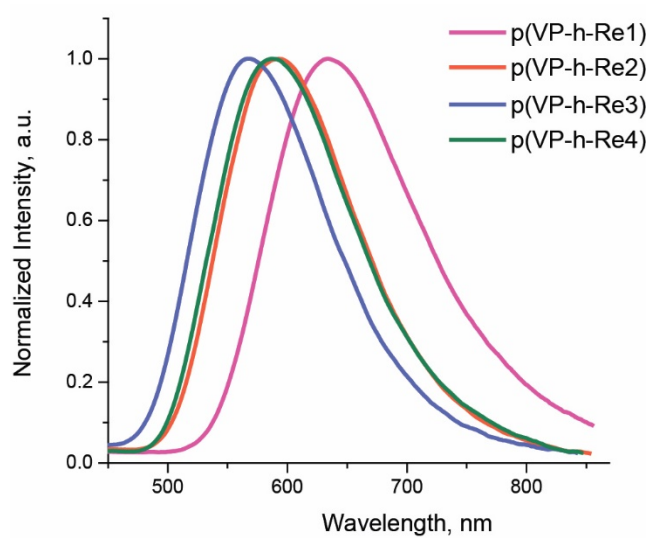

Figure S15. Emission spectra of **p(VP-h-Re)** in H<sub>2</sub>O at 20°C.

## PART 5

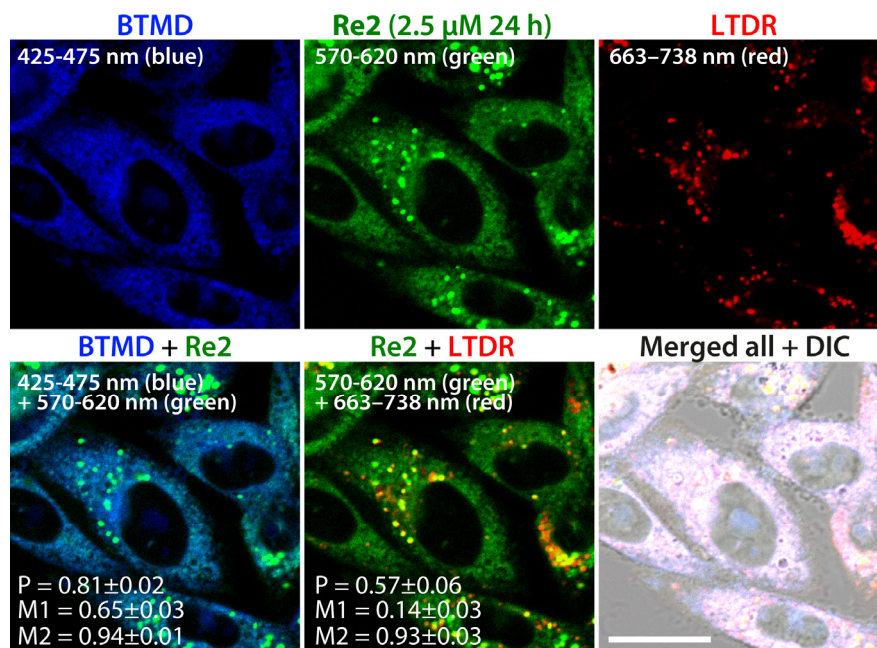

Figure S16. Subcellular distribution of BioTracker Blue Mitochondria Dye (BTMD, blue, 425-475 nm), **Re2** (green, 570-620 nm, 2.5  $\mu$ M, 24 h), LysoTracker Deep Red (LTDR, red) in living CHO-K1 cells. Pearson's (P) and Manders' overlap coefficients (M1 – fraction of first channel that overlaps second channel, M2 – fraction of second channel that overlaps first channel) are presented as mean  $\pm$  standard deviation calculated for 25 cells. Scale bar 20  $\mu$ m.
